# Supplementary material
Source: PubMed Central journal article supplement (PMC7717667)
Supplement: NIHMS1649809-supplement-Supplemental_Material.pdf [file NIHMS1649809-supplement-Supplemental_Material.pdf]

**Table S1. Embryonic development of Tet3 maternal KO mice. Related to Figure 1C.**

| Genotype of female                         | Genotype of male | No. of females examined | No. of total living pups | No. of total absorbed <sup>#</sup> | No. of total dead bodies | Average litter size (Mean ± SD) |
|--------------------------------------------|------------------|-------------------------|--------------------------|------------------------------------|--------------------------|---------------------------------|
| Tet3 <sup>fl/fl</sup>                      | WT               | 6                       | 54                       | 2                                  | 0                        | 9.00 ± 1.41                     |
| Zp3 <sup>Cre</sup> , Tet3 <sup>fl/fl</sup> | WT               | 6                       | 45                       | 3                                  | 4                        | 7.50 ± 1.05                     |
| Zp3 <sup>Cre</sup> , Tet3 <sup>fl/-</sup>  | WT               | 8                       | 39                       | 20                                 | 10                       | 4.88 ± 2.64                     |

WT, C57BL/6J strain.

<sup>#</sup>Absorption is evident by implantation sites without embryos

**Table S2. Litter size and neonatal growth of Tet3 maternal KO mice. Related to Figure 1D.**

| Female                                     | Male | No. of pairs examined | No. of delivery during 3-4 months | No. of total pups at DOB | Average litter size (Mean ± SD) | No. of total viable pups at D3* | Average viable pups (Mean ± SD) |
|--------------------------------------------|------|-----------------------|-----------------------------------|--------------------------|---------------------------------|---------------------------------|---------------------------------|
| Tet3 <sup>fl/fl</sup>                      | WT   | 7                     | 17                                | 119                      | 7.00 ± 2.85                     | 99 (83%)                        | 5.82 ± 3.49                     |
| Zp3 <sup>Cre</sup> , Tet3 <sup>fl/fl</sup> | WT   | 7                     | 18                                | 130                      | 7.22 ± 1.93                     | 87 (67%)                        | 4.83 ± 2.79                     |

WT, C57BL/6J strain. DOB, day of birth. D3, 3 days after birth.

\*All viable mice at D3 lived at least by D20.

**Table S3. Embryonic development of Tet3 heterozygous mice. Related to Figure 2A.**

| Genotype of female  | Genotype of male | No. of females examined | No. of total living pups | No. of total absorbed <sup>#</sup> | No. of total dead bodies | Average litter size (Mean ± SD) |
|---------------------|------------------|-------------------------|--------------------------|------------------------------------|--------------------------|---------------------------------|
| Tet3 <sup>+/-</sup> | WT               | 7                       | 67                       | 5                                  | 0                        | 9.57 ± 0.79                     |
| Tet3 <sup>-/-</sup> | WT               | 11                      | 101                      | 9                                  | 4                        | 9.18 ± 1.54                     |

WT, C57BL/6J strain.

<sup>#</sup>Absorption is evident by implantation sites without embryos

**Table S4. Litter size and neonatal growth of Tet3 maternal KO mice. Related to Figure 2C.**

| Female              | Male                | No. of pairs examined | No. of delivery during 3-4 months | No. of total pups at DOB | Average litter size (Mean ± SD) | No. of total viable pups at D3* | Average viable pups (Mean ± SD) | WT/ Viable pups genotyped | Het/ Viable pups genotyped |
|---------------------|---------------------|-----------------------|-----------------------------------|--------------------------|---------------------------------|---------------------------------|---------------------------------|---------------------------|----------------------------|
| Tet3 <sup>+/-</sup> | WT                  | 5                     | 13                                | 150                      | 11.5±1.13                       | 137 (91%)                       | 10.5±1.13                       |                           |                            |
| Tet3 <sup>-/-</sup> | WT                  | 9                     | 21                                | 197                      | 9.38±3.47                       | 135 (69%)                       | 6.42±3.87                       | 76/123 (62%)              | 47/123 (38%)               |
| WT                  | Tet3 <sup>+/-</sup> | 4                     | 12                                | 90                       | 7.50±2.68                       | 67 (74%)                        | 5.58±3.23                       | 44/67 (66%)               | 23/67 (34%)                |

WT, C57BL/6J strain. DOB, day of birth. D3, 3 days after birth.

\*All viable mice at D3 lived at least by D20.

**Table S5. Litter size and neonatal growth of pronuclear transferred embryos. Related to Figure 3.**

|       | No. of reconstructed zygotes | No. of embryos transferred | No. of pseudopregnant females | No. of total absorbed <sup>#</sup> | No. of pups at E19.5 | Average body weight (g) (Mean ± SD) | Average placenta weight (mg) (Mean ± SD) | No. of viable mice at D3* |
|-------|------------------------------|----------------------------|-------------------------------|------------------------------------|----------------------|-------------------------------------|------------------------------------------|---------------------------|
| NT-WT | 53                           | 53                         | 3                             | 18                                 | 30                   | 1.38 ± 0.14                         | 99.1 ± 18.9                              | 27 (90%)                  |
| NT-KO | 59                           | 59                         | 4                             | 14                                 | 32                   | 1.44 ± 0.19                         | 97.1 ± 14.6                              | 32 (100%)                 |

D3, 3 days after birth.

\*All viable mice at D3 lived at least by D50.

<sup>#</sup>Absorption is evident by implantation sites without embryos

**Table S6. Summary of RRBS libraries**

| Samples        |      | Total sequencing reads | Mapped reads | Percentage of mapped reads (%) | 1x covered CpGs | 5x covered CpGs | Bisulfite conversion rate (%)* |
|----------------|------|------------------------|--------------|--------------------------------|-----------------|-----------------|--------------------------------|
| Sperm          | rep1 | 16,628,193             | 9,461,442    | 57%                            | 1,821,032       | 1,198,158       | 99.5%                          |
|                | rep2 | 16,351,520             | 8,993,336    | 55%                            | 1,863,052       | 1,115,298       | 99.5%                          |
| WT-Zygote      | rep1 | 29,301,586             | 18,606,507   | 64%                            | 1,891,545       | 1,344,307       | 99.1%                          |
|                | rep2 | 25,202,017             | 15,801,665   | 63%                            | 2,024,534       | 1,339,205       | 99.1%                          |
| CKO-Zygote     | rep1 | 25,209,224             | 16,007,857   | 64%                            | 2,012,605       | 1,345,112       | 99.1%                          |
|                | rep2 | 28,288,621             | 18,161,295   | 64%                            | 1,849,288       | 1,315,887       | 99.1%                          |
| WT-Blastocyst  | rep1 | 13,986,491             | 8,657,638    | 62%                            | 1,938,898       | 1,194,202       | 99.7%                          |
|                | rep2 | 14,628,525             | 8,894,143    | 61%                            | 1,782,987       | 1,119,954       | 99.7%                          |
| CKO-Blastocyst | rep1 | 13,622,324             | 8,513,953    | 63%                            | 1,926,537       | 1,119,397       | 99.7%                          |
|                | rep2 | 14,129,094             | 8,717,651    | 62%                            | 1,985,084       | 1,152,511       | 99.7%                          |

\*Bisulfite conversion rates were estimated by non-converted cytosines in non-CpG context.
